# Supplementary material for: Distinct host-pathogen and microbiome responses of aoudad (Ammotragus lervia) and bighorn sheep (Ovis canadensis) following exposure to Mycoplasma ovipneumoniae
Source: Research Square preprint supplement (doi:10.21203/rs.3.rs-7383688/v1), 2025-09-09
Supplement: Supplementary file 1 [file 3a8ee2308b6672721b21a775.docx]

**The ARRIVE Essential 10**

**These items are the basic minimum to include in a manuscript. Without this**

**information, readers and reviewers cannot assess the reliability of the findings.**

**Study design 1**

**For each experiment, provide brief details of study design including:**

**a. The groups being compared, including control groups. If no control group has been used, the rationale should be stated.**

*The groups being compared are described in lines 138-145.*

**b. The experimental unit (e.g. a single animal, litter, or cage of animals).**

*Experimental unit is described in lines 144-145.*

**Sample size 2**

**a. Specify the exact number of experimental units allocated to each group, and the total number in each experiment. Also indicate the total number of animals used.**

*The number of animals used and in each group is described in lines 138-145.*

**b. Explain how the sample size was decided. Provide details of any a priori sample size**

**calculation, if done.**

*Sample size selection is described in lines 153-159.*

**Inclusion and exclusion criteria 3**

**a. Describe any criteria used for including and excluding animals (or experimental units) during the experiment, and data points during the analysis. Specify if these criteria were established a priori. If no criteria were set, state this explicitly.**

*The individuals/samples included/ excluded from the study are described in lines 138-145 and 160-169.*

**b. For each experimental group, report any animals, experimental units or data points not**

**included in the analysis and explain why. If there were no exclusions, state so.**

*The individuals/samples included/ excluded from the study are described in lines 138-145 and 160-169.*

**c. For each analysis, report the exact value of n in each experimental group.**

*Sample size numbers can be found in lines 134-143 and 160-169.*

**Randomisation 4**

**a. State whether randomisation was used to allocate experimental units to control and treatment groups. If done, provide the method used to generate the randomisation sequence.**

*Details on randomization can be found in lines 144-152.*

b**. Describe the strategy used to minimise potential confounders such as the order of**

**treatments and measurements, or animal/cage location. If confounders were not controlled,**

**state this explicitly.**

*Limitations to the study design can be found in lines 790-805.*

**Blinding 5**

**Describe who was aware of the group allocation at the different stages of the experiment (during the allocation, the conduct of the experiment, the outcome assessment, and the data analysis).**

*Details on blinding can be found in lines 144-152.*

**Outcome measures 6**

**a. Clearly define all outcome measures assessed (e.g. cell death, molecular markers, or**

**behavioural changes).**

*The outcome measure used to assess sample size can be found in lines 153-159.*

**b. For hypothesis-testing studies, specify the primary outcome measure, i.e. the outcome**

**measure that was used to determine the sample size.**

*The outcome measure used to assess sample size can be found in lines 153-159.*

**Statistical methods 7**

**a. Provide details of the statistical methods used for each analysis, including software used.**

*Statistical methods can be found in lines 158-159, 222-259, and 289-341.*

**b. Describe any methods used to assess whether the data met the assumptions of the**

**statistical approach, and what was done if the assumptions were not met.**

*Handling data appropriateness for analyses is described in lines 251-252, 256-259, 292-300, 305-325, and 334-341.*

**Experimental animals 8**

**a. Provide species-appropriate details of the animals used, including species, strain and**

**substrain, sex, age or developmental stage, and, if relevant, weight.**

*Animal details can be found in lines 134-145.*

**b. Provide further relevant information on the provenance of animals, health/immune status, genetic modification status, genotype, and any previous procedures.**

*All details known about the animals prior to arrival to the study site can be found in lines 134-145. No knowledge on the immune or health statuses was available. We assume no wild animals had a history of genetic modification or relevant genotypic variations germaine to this study. All known procedures and activities the animals were subjected to are described in the manuscript. Additionally, study limitations details can be found in lines 793-808.*

**Experimental procedures 9**

**For each experimental group, including controls, describe the procedures in enough detail to allow others to replicate them, including:**

1. **What was done, how it was done and what was used.**

*Details on the materials and methods for animal procedures can be found in lines 160-204.*

**When and how often.**

*Frequency and timing of sample collection and animal capture is described in lines 160-180.*

1. **Where (including detail of any acclimatisation periods).**

*Location details can be found in lines 134-138.*

1. **Why (provide rationale for procedures).**

*Rationale for capture and eprinomectin administration is detailed in lines 171-176.*

*Details on the rationale for inoculum preparation methods are specified in lines 182-191 and described in the 37th reference.*

*Lung tissue collection rationale is described in lines 193-198.*

*Rationale for tonsillar swabs and respiratory tissues is described in lines 193-204.*

**Results 10**

**For each experiment conducted, including independent replications, report:**

1. **Summary/descriptive statistics for each experimental group, with a measure of variability where applicable (e.g. mean and SD, or median and range).**

*All summary statistics across comparators, including measures of centrality and variability can be found in the Supplementary Information file : Supplementary Tables 1,2,3 and 4.*

1. **If applicable, the effect size with a confidence interval.**

*All effect sizes with confidence intervals can be found in the Supplementary Information file : Supplementary Tables 1,2,3 and 4.*
