# Supplementary material for: Distinct host-pathogen and microbiome responses of aoudad (Ammotragus lervia) and bighorn sheep (Ovis canadensis) following exposure to Mycoplasma ovipneumoniae
Source: Research Square preprint supplement (doi:10.21203/rs.3.rs-7383688/v1), 2025-09-09
Supplement: Supplementary file 2 [file 5635f201ef114dcbf97327b6.docx]

Supplementary Table 1. Association of the Chao1 and Shannon indices with species, treatment groups, and the presence of relevant respiratory bacteria in tonsillar swabs

| **Variable** | **Chao1 Coefficient** | **Chao1 95% CI** | **Chao1 P value** | **Shannon Coefficient** | **Shannon 95% CI** | **Shannon P value** |
| --- | --- | --- | --- | --- | --- | --- |
| Species (AD versus BHS) | -1.46 | -18.36, 15.44 | 0.866 | 0.21 | -0.14, 0.56 | 0.242 |
| Sex (Male versus Female) | -7.04 | -23.75, 9.68 | 0.413 | 0.06 | -0.3, 0.42 | 0.761 |
| Age | -0.17 | -0.49, 0.14 | 0.281 | 0.003 | -0.004, 0.009 | 0.44 |
| Treatment (wash versus movi) | 8.42 | -9.75, 26.59 | 0.368 | 0.39 | 0.02, 0.76 | 0.0425 |
| Treatment (control versus movi) | 14.77 | -8.49, 38.03 | 0.219 | -0.16 | -0.63, 0.31 | 0.5134 |
| Mycoplasma ovipneumoniae detection via qPCR (yes vs no) | 11.18 | -8.19, 30.56 | 0.263 | 0.47 | 0.07, 0.87 | 0.0249 |
| Bibersteinia trehalosi detection (yes versus no) | -9.8 | -26.24, 6.64 | 0.248 | -0.23 | -0.58, 0.12 | 0.205 |
| Mannheimia haemolytica detection (yes versus no) | 20.44 | -5.76, 46.63 | 0.132 | 0.63 | 0.08, 1.18 | 0.0295 |
| Trueperella pyogenes detection (yes versus no) | 2.02 | -18.8, 22.84 | 0.85 | -0.06 | -0.51, 0.38 | 0.78 |

Supplementary Table 2. Association of the Chao1 and Shannon indices with species, days post infection, treatment groups, and the presence of relevant respiratory bacteria in lower respiratory tract tissue samples

| **Variable** | **Chao1 Coefficient** | **Chao1 95% CI** | **Chao1 P value** | **Shannon Coefficient** | **Shannon 95% CI** | **Shannon P value** |
| --- | --- | --- | --- | --- | --- | --- |
| Species (BHS versus AD) | -61.7 | -108.82, -14.58 | 0.0161 | -1.62 | -2.44, -0.79 | 0.000681 |
| Sex (Male versus Female) | 30.57 | -19.39, 80.53 | 0.241 | -0.03 | -1.04, 0.97 | 0.946 |
| Age | 0.58 | 0.08, 1.07 | 0.0299 | 0.01 | 0.002, 0.02 | 0.021 |
| Treatment (wash versus movi) | 28.1 | -23.38, 79.57 | 0.294 | 0.24 | -0.78, 1.26 | 0.647685 |
| Days post infection (late versus early) | 23.26 | -27.26, 73.77 | 0.375 | 0.5 | -0.49, 1.48 | 0.329 |
| Mycoplasma ovipneumoniae prevalence via PCR (yes vs no) | -8.82 | -65.77, 48.14 | 0.764 | 0.28 | -0.83, 1.39 | 0.629961 |
| Pasteurella multocida detection (yes versus no) | -20.69 | -71.89, 30.51 | 0.436 | -0.31 | -1.37, 0.76 | 0.58 |
| Bibersteinia trehalosi detection (yes versus no) | -32.95 | -88.59, 22.69 | 0.257 | -0.93 | -2.06, 0.19 | 0.116 |
| Mannheimia haemolytica detection (yes versus no) | -39.17 | -91.79, 13.46 | 0.157 | -0.63 | -1.74, 0.48 | 0.276 |
| Trueperella pyogenes detection (yes versus no) | -23.53 | -79.9, 32.84 | 0.421 | -1.18 | -2.27, -0.09 | 0.044 |

Supplementary Table 3. Association between the beta diversity of the tonsillar microbiome with species, days post infection, treatment groups, and the presence of relevant respiratory bacteria in tonsillar swabs

|  | Beta diversity distance | | |
| --- | --- | --- | --- |
| Variable | Bray-Curtis | Jaccard | Aitchison |
| Species | R2=0.058  P value=0.011  Dispersion homogeneity P value=0.3181 | R2=0.05  P value=0.001  Dispersion homogeneity P value=0.5268 | R2=0.08  P value=0.001  Dispersion homogeneity P value=0.0002893 |
| Sex | R2=0.03  P value=0.089 | R2=0.021  P value=0.263 | R2=0.02  P value=0.418 |
| Age | R2=0.08  P value=0.003  Dispersion homogeneity P value= N/A | R2=0.06  P value=0.001  Dispersion homogeneity P value= N/A | R2=0.11  P value=0.001  Dispersion homogeneity P value= N/A |
| Treatment Groups | R2=0.042  P value=0.251 | R2=0.04  P value=0.243 | R2=0.04  P value=0.251 |
| Days post infection | R2=0.221  P value=0.001  Dispersion homogeneity P value=0.0001515 | R2=0.16  P value=0.001  Dispersion homogeneity P value=0.001067 | R2=0.33  P value=0.001  Dispersion homogeneity P value=0.003227 |
| *M. ovipneumoniae* detection via qPCR | R2=0.096  P value=0.001  Dispersion homogeneity P value=0.0226 | R2=0.06  P value=0.001  Dispersion homogeneity P value=0.03558 | R2=0.16  P value=0.001  Dispersion homogeneity P value=0.5392 |
| *B. trehalosi* detection | R2=0.04  P value=0.032  Dispersion homogeneity P value=0.3532 | R2=0.04  P value=0.003  Dispersion homogeneity P value=0.4499 | R2=0.04  P value=0.029  Dispersion homogeneity P value=0.105 |
| *M. haemolytica* detection | R2=0.015  P value=0.531 | R2=0.02  P value=0.684 | R2=0.02  P value=0.394 |
| *T. pyogenes* detection | R2=0.021  P value=0.328 | R2=0.02  P value=0.165 | R2=0.02  P value=0.465 |

Supplementary Table 4. Association between the beta diversity of the lower respiratory tract with species, days post infection, treatment groups, and the presence of relevant respiratory bacteria in lower respiratory tract tissue samples

|  | Beta diversity distance | | |
| --- | --- | --- | --- |
| Variable | Bray-Curtis | Jaccard | Aitchison |
| Species | R2=0.07  P value=0.04  Dispersion homogeneity P value=0.2509 | R2=0.06  P value=0.025  Dispersion homogeneity P value=0.4267 | R2=0.12  P value=0.004  Dispersion homogeneity P value=0.0008775 |
| Sex | R2=0.06  P value=0.062 | R2=0.05  P value=0.028  Dispersion homogeneity P value=0.06581 | R2=0.06  P value=0.107 |
| Age | R2=0.07  P value=0.032  Dispersion homogeneity P value=N/A | R2=0.05  P value=0.032  Dispersion homogeneity P value=N/A | R2=0.08  P value=0.014  Dispersion homogeneity P value=N/A |
| Treatment Groups | R2=0.12  P value=0.003  Dispersion homogeneity P value=0.4489 | R2=0.07  P value=0.001  Dispersion homogeneity P value=0.3243 | R2=0.05  P value=0.131 |
| Days post infection | R2=0.12  P value=0.001  Dispersion homogeneity P value=0.7686 | R2=0.07  P value=0.001  Dispersion homogeneity P value=0.5948 | R2=0.06  P value=0.094 |
| *M. ovipneumoniae* prevalence via PCR | R2=0.07  P value=0.009  Dispersion homogeneity P value=0.1018 | R2=0.06  P value=0.02  Dispersion homogeneity P value=0.03832 | R2=0.03  P value=0.733 |
| *P. multocida* prevalence | R2=0.15  P value=0.001  Dispersion homogeneity P value=0.5103 | R2=0.08  P value=0.001  Dispersion homogeneity P value=0.454 | R2=0.07  P value=0.074 |
| *B. trehalosi* prevalence | R2=0.04  P value=0.49 | R2=0.03  P value=0.699 | R2=0.05  P value=0.126 |
| *M. haemolytica* prevalence | R2=0.15  P value=0.001  Dispersion homogeneity P value=0.005215 | R2=0.1  P value=0.001  Dispersion homogeneity P value=0.001621 | R2=0.08  P value=0.026  Dispersion homogeneity P value=0.015 |
| *T. pyogenes* prevalence | R2=0.05  P value=0.189 | R2=0.04  P value=0.361 | R2=0.06  P value=0.141 |


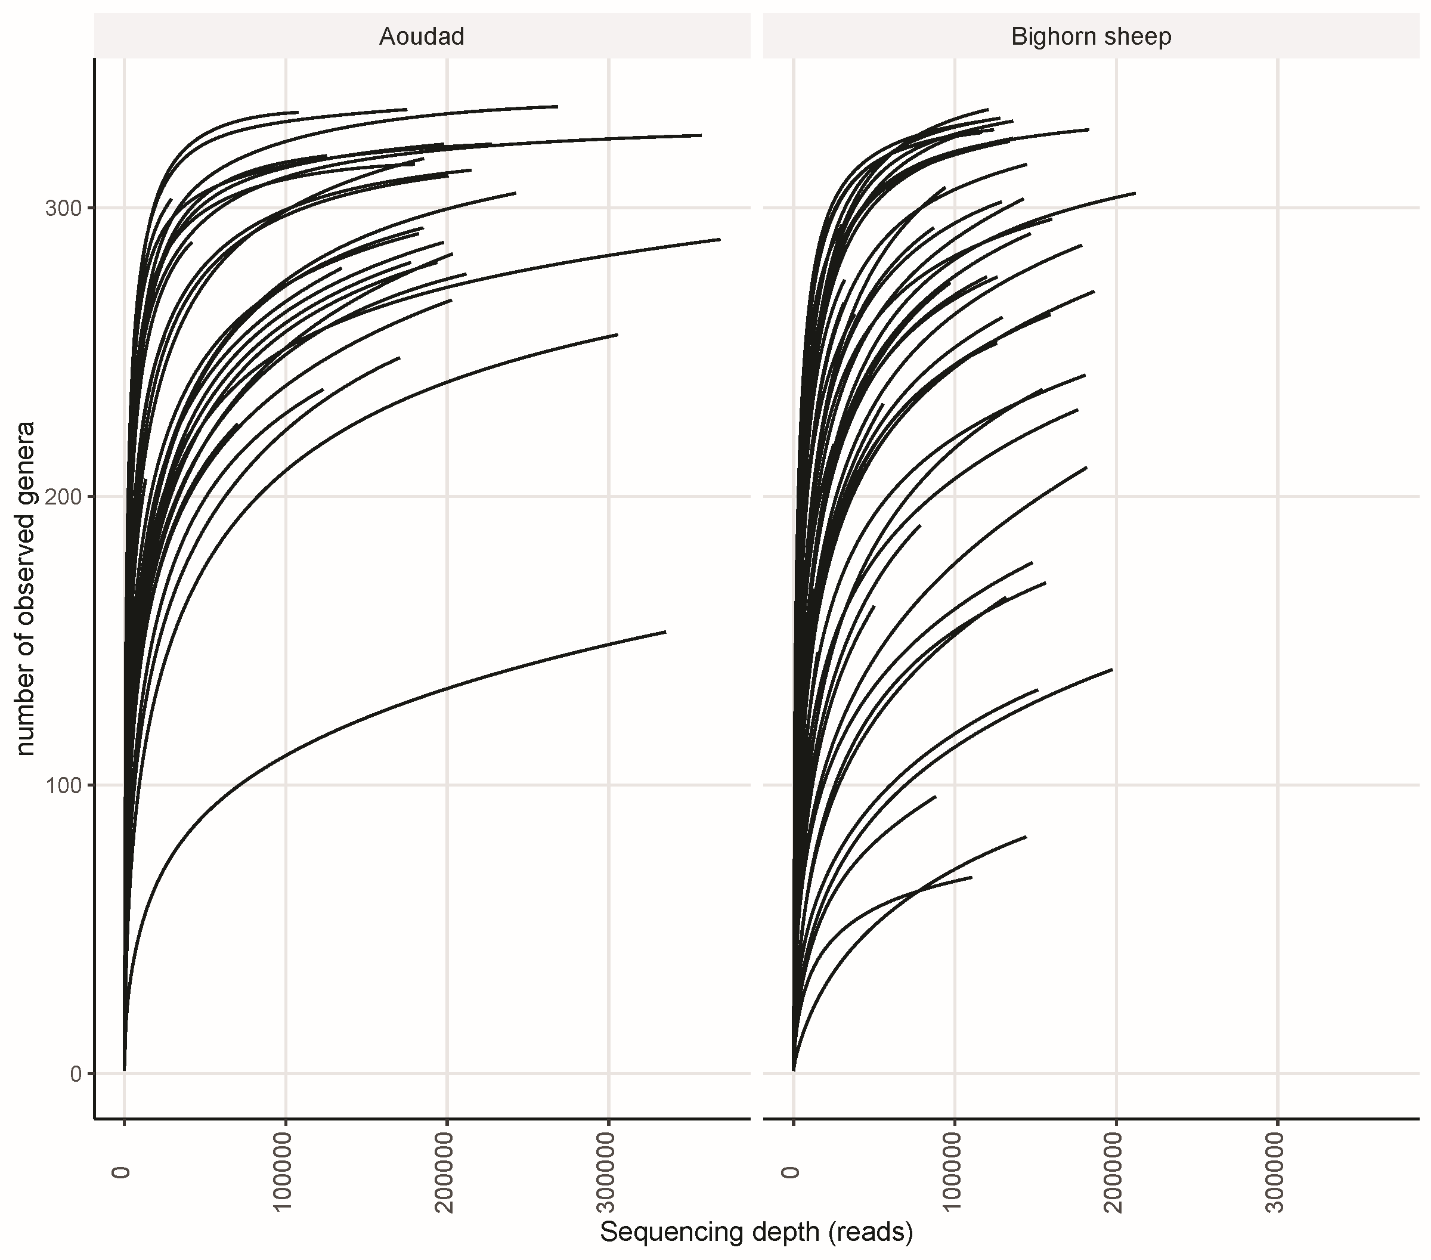


Figure S1: Rarefaction curves for full-length 16S rRNA gene. Each line represents a single sample. The number of observed genera is represented in the y axis and the sequencing depth in the x-axis. The rarefaction curves are stratified by species; aoudad (Ammotragus lervia), and bighorn sheep (Ovis canadensis; sheep).


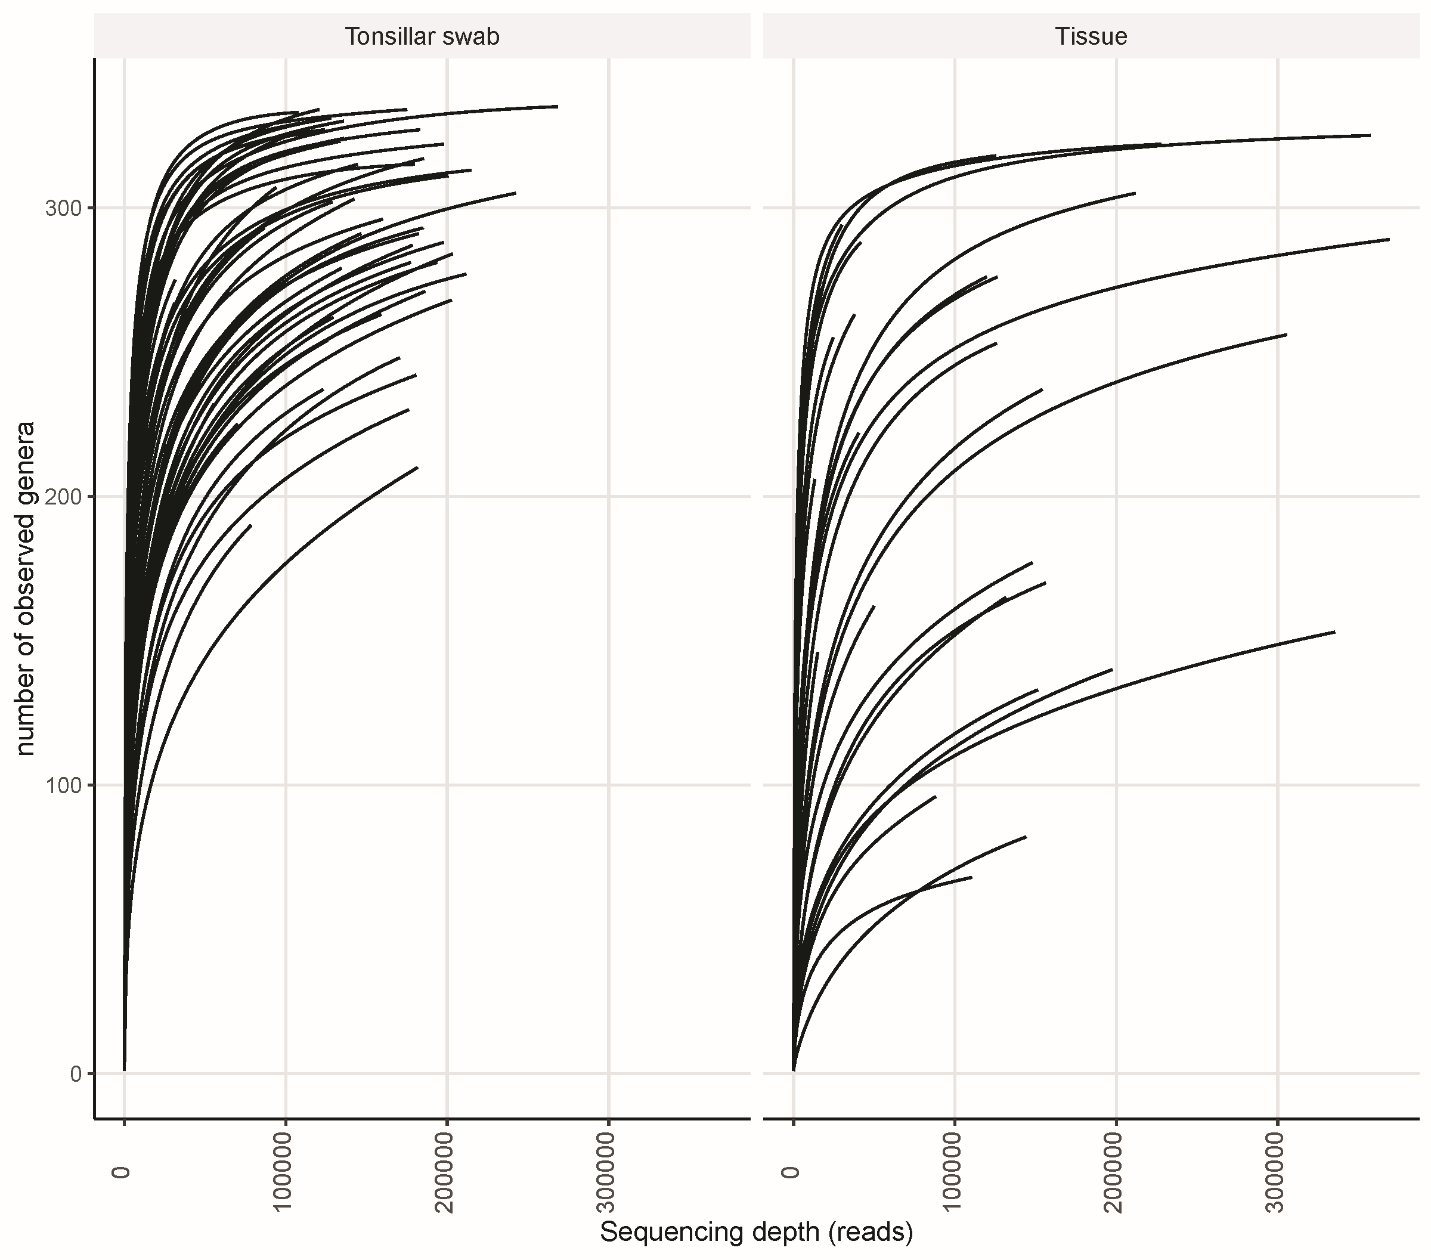


Figure S2: Rarefaction curves for full-length 16S rRNA gene. Each line represents a single sample. The number of observed genera is represented in the y axis and the sequencing depth in the x-axis. The rarefaction curves are stratified by sample type; tissue from the lower respiratory tract (lung parenchyma and respiratory-associated lymph nodes) and tonsillar swabs (swab).


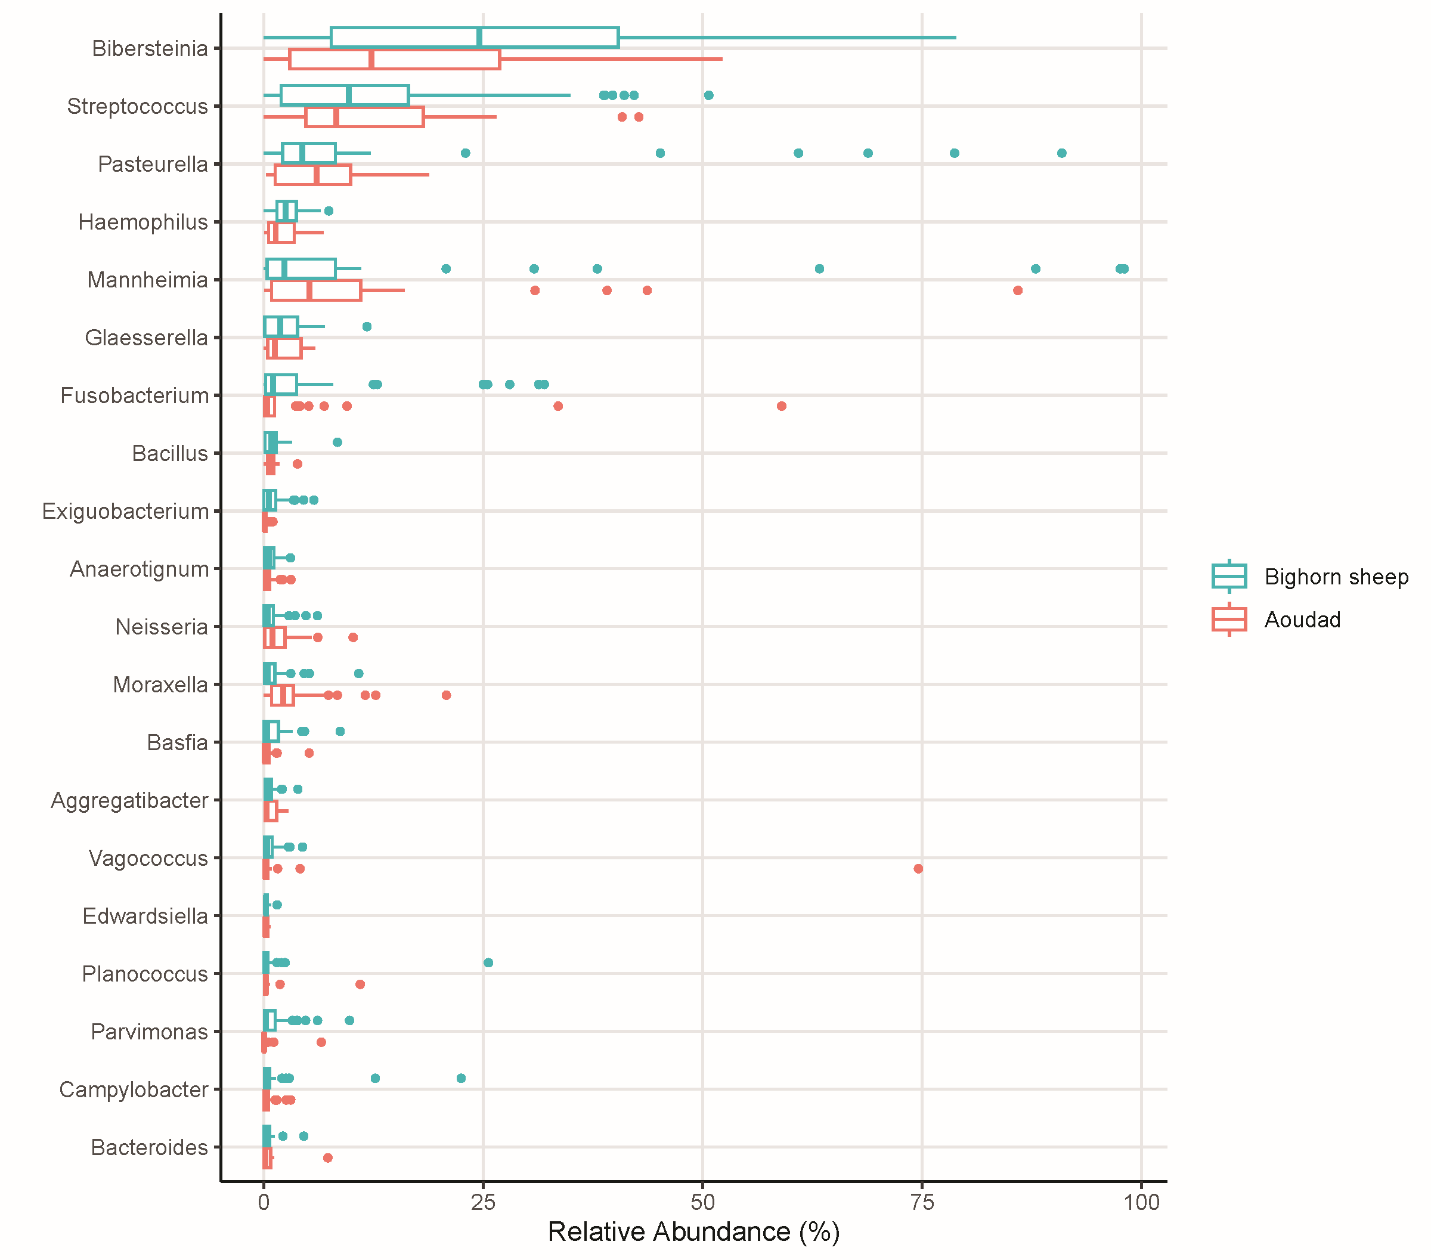


Figure S3: Boxplot of the relative abundance of the 20 most abundant bacterial genera (in descending order) in samples collected from aoudad (Ammotragus lervia), and bighorn sheep (Ovis canadensis; sheep). Boxes indicate the interquartile range (IQR, the middle 50% of the data), with a line within the box to identify the median relative abundance. Whiskers represent ± 1.5 times the IQR. Individual points represent outliers.


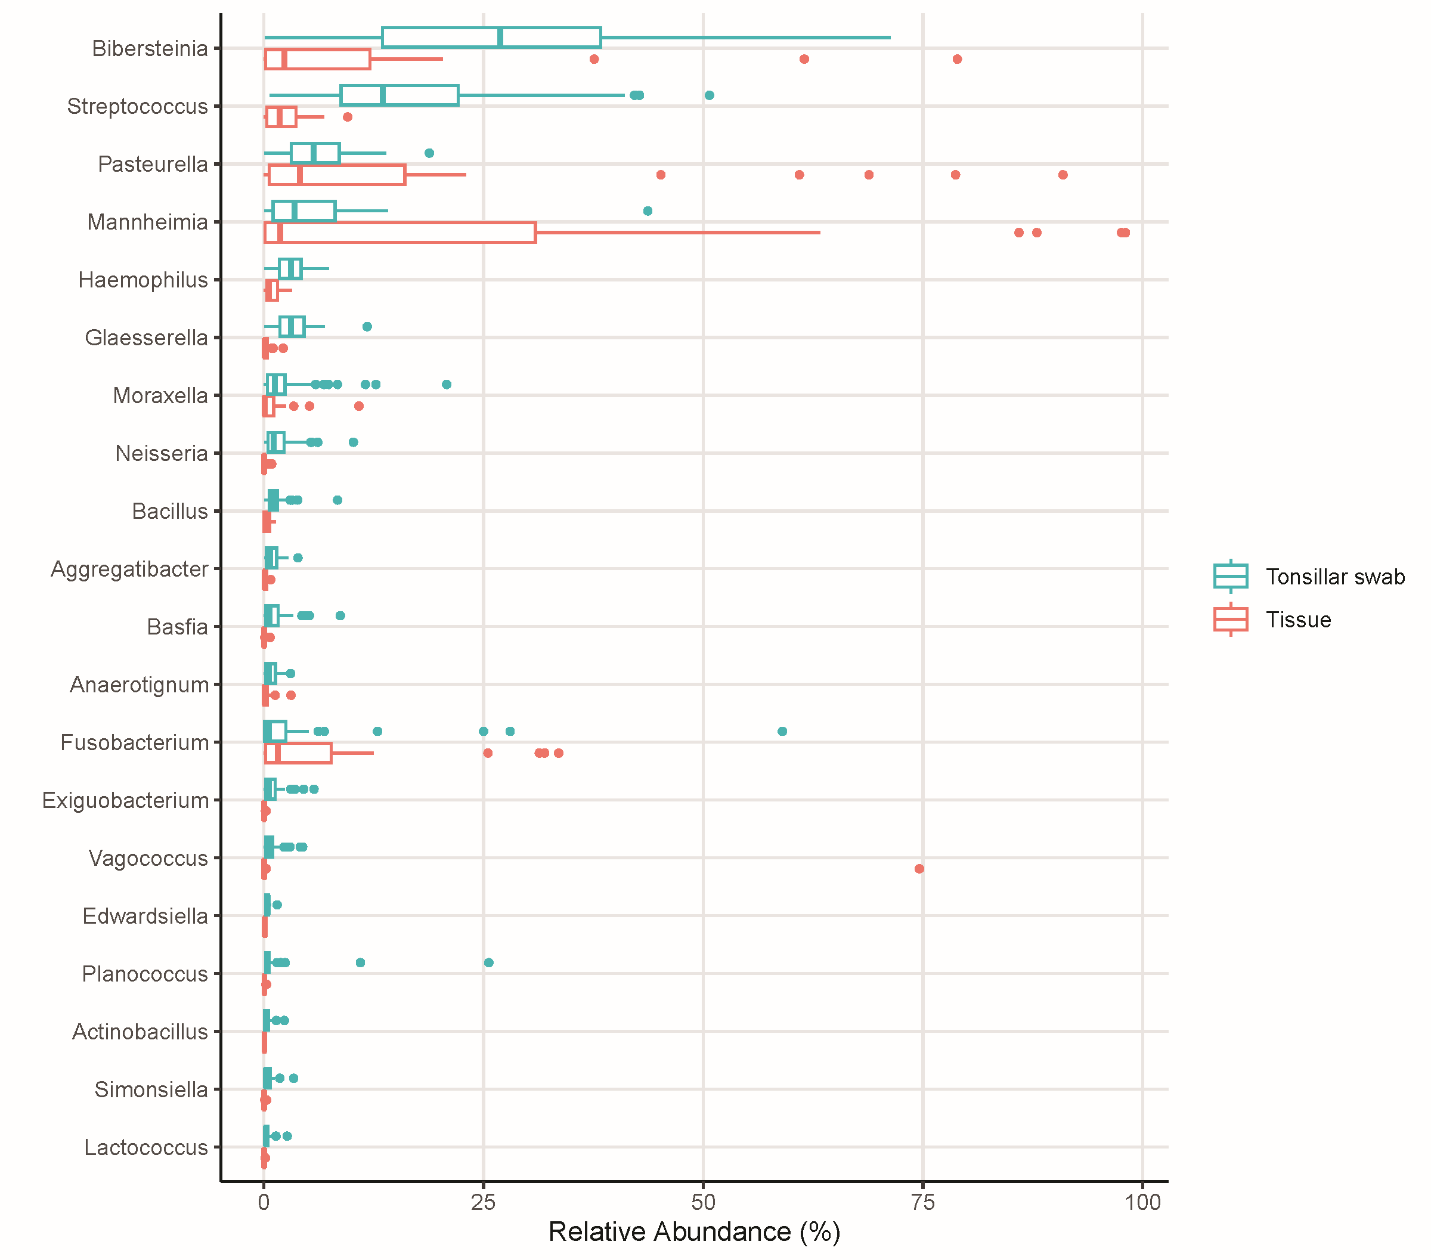


Figure S4: Boxplot of the relative abundance of the 20 most abundant bacterial genera (in descending order) in samples from two locations; tissue from the lower respiratory tract (lung parenchyma and respiratory-associated lymph nodes) and tonsillar swabs (swab). Boxes indicate the interquartile range (IQR, the middle 50% of the data), with a line within the box to identify the median relative abundance. Whiskers represent ± 1.5 times the IQR. Individual points represent outliers.


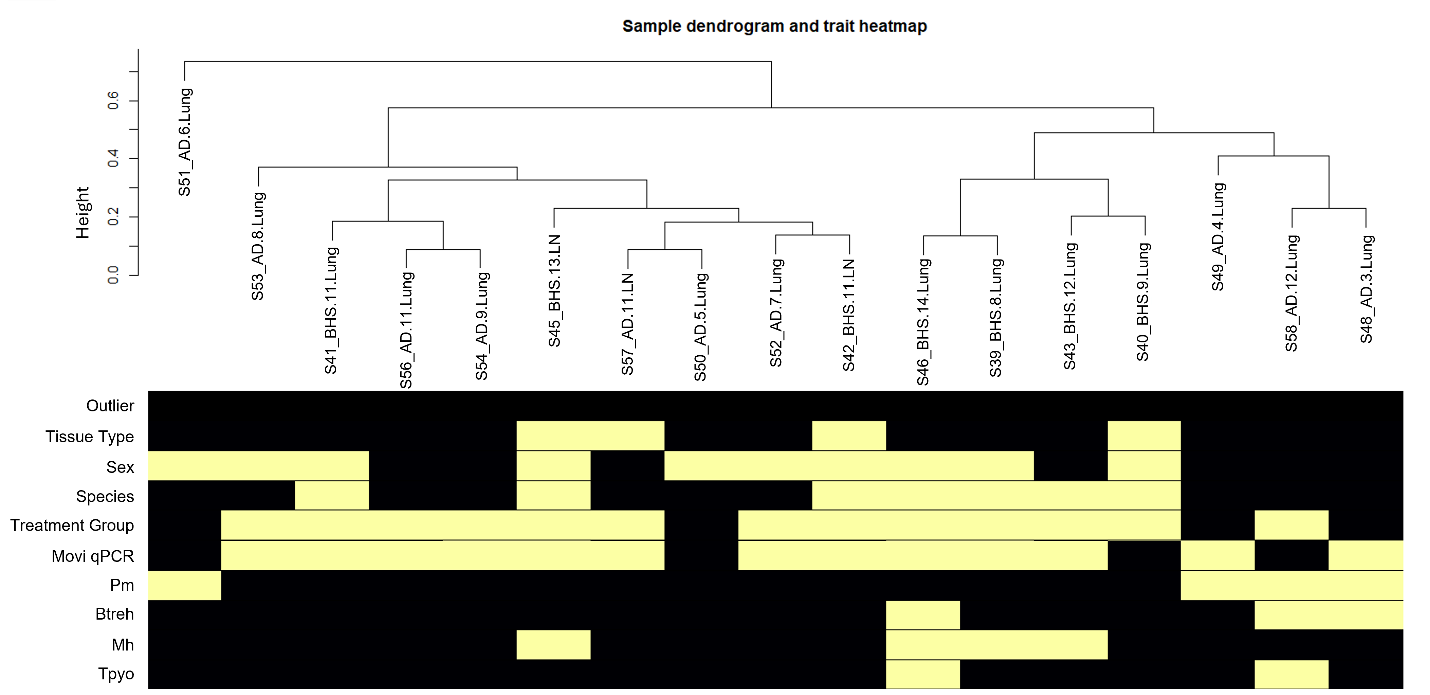


Figure S5. Hierarchical clustering of clinical metadata across all sheep samples utilized for transcriptome gene expression network analysis. Standardized connectivity was calculated from network adjacency matrices and used to classify potential outliers (Z.k < -5); no sample was identified as an outlier for downstream analyses (Outlier; No=0, 1=Yes). Colors indicate an increase (yellow/white) or decreased (purple/black) value for each trait. Binary metadata variables were utilized for outlier identification (Tissue Type (lung = 0, lymph node = 1), Sex (Female=0, Male=1), Species (AD = 0, BHS = 1), Treatment Group (Movi=0, Wash=1), Movi qPCR (*Mycoplasma ovipneumoniae* qPCR results; negative = 0, positive = 1), Pm (*Pasteurella multocida* culture results; negative = 0, positive = 1), Btreh (*P Bibersteinia trehalosi* culture results; negative = 0, positive = 1), Mh (*Mannheimia haemolytica* culture results; negative = 0, positive = 1), Tpyo (*Trueperella pyogenes* culture results; negative = 0, positive = 1).


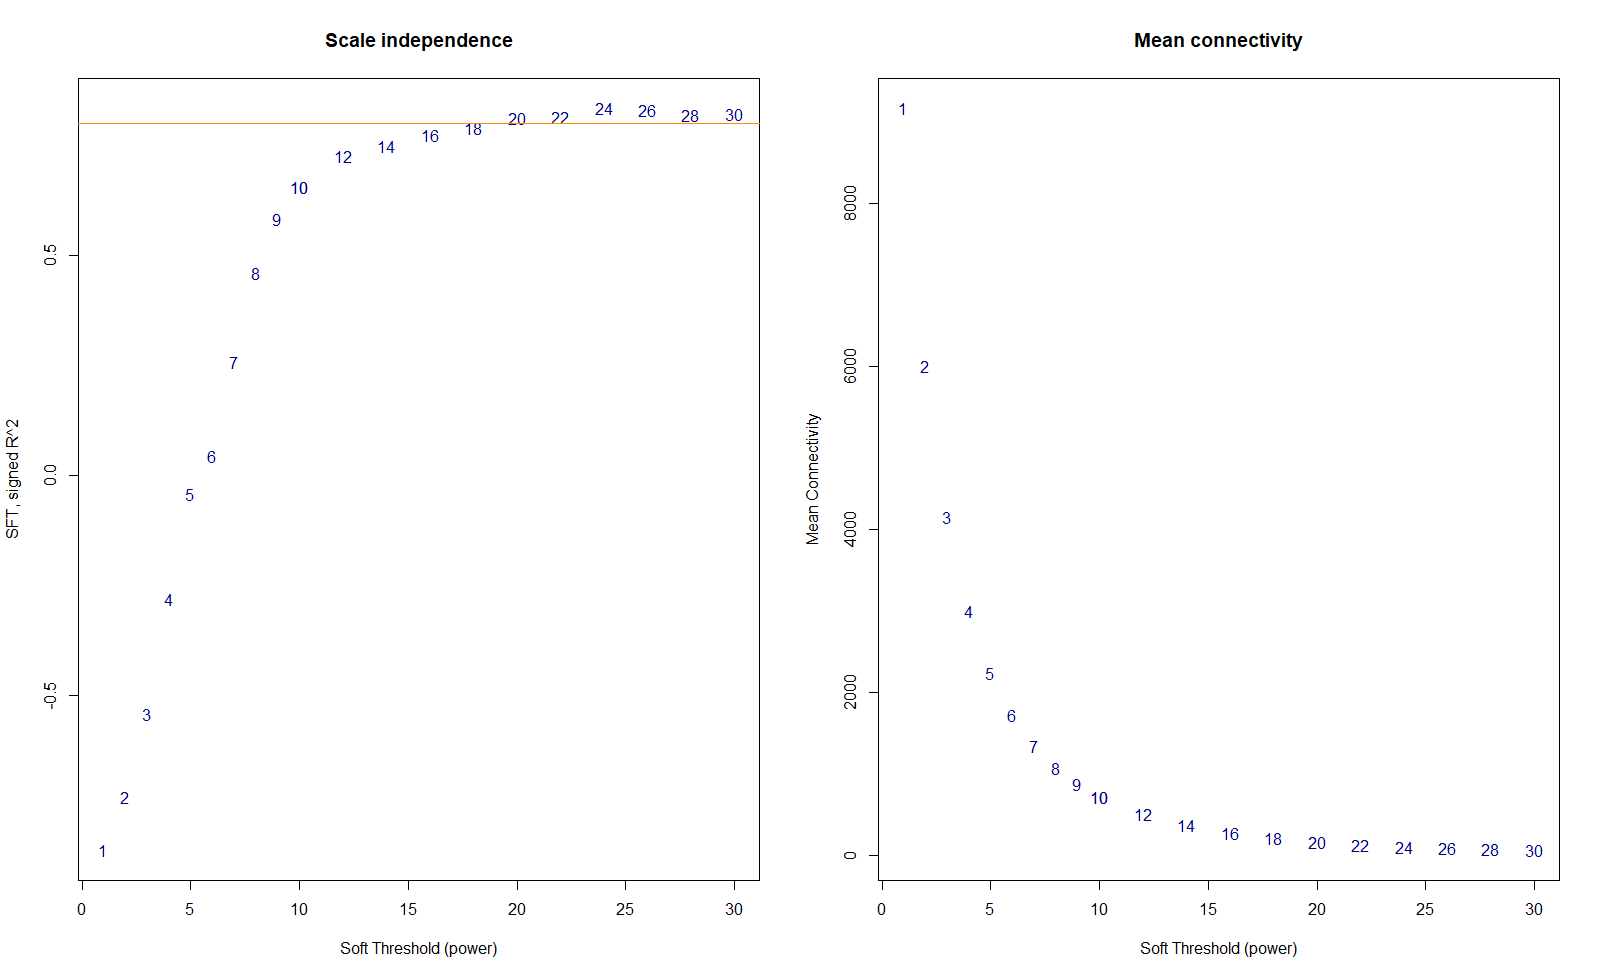


Figure S6. Soft thresholding (β) selection for signed weighed correlation network construction of all sheep samples via scale free topology analysis. A) Scale free topology indices (R2; y-axis) at increasing soft threshold powers (β; x-axis). The value β = 24 was selected, seen where the saturation curve is above 0.8 (orange horizontal line). B) Increasing soft threshold powers (β; x-axis) with respect to decreasing mean connectivity (y-axis).
